# Supplementary material for: Gut Virome Analysis of Cameroonians Reveals High Diversity of Enteric Viruses, Including Potential Interspecies Transmitted Viruses
Source: PubMed Central journal article supplement (PMC6344602; doi:10.1128/msphere.00585-18), 2019-01-23
Supplement: mSphere.00585-18-sf001.pdf [file mSphere.00585-18-sf001.pdf]

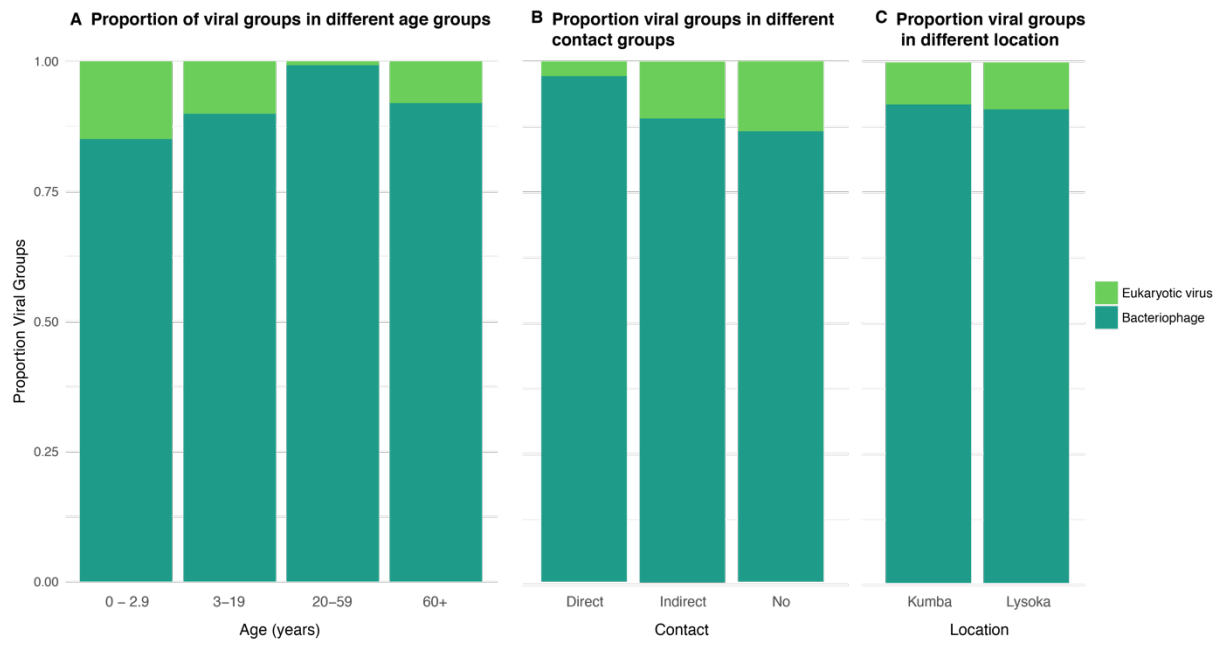

Fig. S1
