# Supplementary material for: Gut Virome Analysis of Cameroonians Reveals High Diversity of Enteric Viruses, Including Potential Interspecies Transmitted Viruses
Source: PubMed Central journal article supplement (PMC6344602; doi:10.1128/msphere.00585-18), 2019-01-23
Supplement: mSphere.00585-18-st001.pdf [file mSphere.00585-18-st001.pdf]

**Supplemental Table S1: Metadata pools and reads**

| <b>Pool Number</b> | <b>Age group (years)</b> | <b>Contact with bats*</b> | <b>Location</b> | <b>Reads after trimming</b> | <b>Virus reads (%)</b> | <b>Phage reads<sup>#</sup> (%)</b> | <b>Eukaryotic virus reads<sup>##</sup> (%)</b> | <b>Others reads (%)</b> |
|--------------------|--------------------------|---------------------------|-----------------|-----------------------------|------------------------|------------------------------------|------------------------------------------------|-------------------------|
| HP01               | 0-2.9                    | I                         | Kumba           | 6821225                     | 1845731<br>(27.1)      | 1837808<br>(99.6)                  | 7923 (0.4)                                     | 4975494<br>(72.9)       |
| HP02               | 0-2.9                    | I                         | Lysoka          | 8659618                     | 3383520<br>(39.1)      | 3309931<br>(97.8)                  | 73589 (2.2)                                    | 5276098<br>(60.9)       |
| HP03               | 3-19                     | I                         | Lysoka          | 5783225                     | 5015710<br>(86.7)      | 112782<br>(2.2)                    | 4902928<br>(97.8)                              | 767515<br>(13.3)        |
| HP04               | 3-19                     | I                         | Lysoka          | 5882399                     | 440446<br>(7.5)        | 434693<br>(98.7)                   | 5753 (1.3)                                     | 5441953<br>(92.5)       |
| HP05               | 0-2.9                    | I                         | Lysoka          | 5505387                     | 917476<br>(16.7)       | 899273<br>(98)                     | 18203 (2)                                      | 4587911<br>(83.3)       |
| HP06               | 3-19                     | D                         | Lysoka          | 7902091                     | 808918<br>(10.2)       | 730485<br>(90.3)                   | 78433 (9.7)                                    | 7093173<br>(89.8)       |
| HP07               | 20-59                    | D                         | Kumba           | 8078419                     | 1898171<br>(23.5)      | 1838758<br>(96.9)                  | 59413 (3.1)                                    | 6180248<br>(76.5)       |
| HP08               | 3-19                     | D                         | Lysoka          | 6372426                     | 813054<br>(12.8)       | 805901<br>(99.1)                   | 7153 (0.9)                                     | 5559372<br>(87.2)       |
| HP09               | 3-19                     | D                         | Lysoka          | 15488238                    | 973410<br>(6.3)        | 961560<br>(98.8)                   | 11850 (1.2)                                    | 14514828<br>(93.7)      |
| HP10               | 3-19                     | D                         | Lysoka          | 30267100                    | 2741917<br>(9.1)       | 2424683<br>(88.4)                  | 317234<br>(11.6)                               | 27525183<br>(90.9)      |
| HP11               | 0-2.9                    | N                         | Kumba           | 6424025                     | 1592461<br>(24.8)      | 1532208<br>(96.2)                  | 60253 (3.8)                                    | 4831564<br>(75.2)       |
| HP12               | 0-2.9                    | N                         | Kumba           | 8938045                     | 2289364<br>(25.6)      | 2266613<br>(99)                    | 22751 (1)                                      | 6648681<br>(74.4)       |
| HP13               | 0-2.9                    | N                         | Kumba           | 7172273                     | 759472<br>(10.6)       | 759450<br>(100)                    | 22 (0)                                         | 6412801<br>(89.4)       |
| HP14               | 0-2.9                    | N                         | Kumba           | 8317276                     | 2904795<br>(34.9)      | 2874272<br>(98.9)                  | 30523 (1.1)                                    | 5412481<br>(65.1)       |
| HP15               | 0-2.9                    | N                         | Kumba           | 6496464                     | 1809123<br>(27.8)      | 1805705<br>(99.8)                  | 3418 (0.2)                                     | 4687341<br>(72.2)       |
| HP16               | 0-2.9                    | N                         | Kumba           | 5735230                     | 1836646<br>(32)        | 1824983<br>(99.4)                  | 11663 (0.6)                                    | 3898584<br>(68)         |
| HP17               | 0-2.9                    | N                         | Kumba           | 6531053                     | 3302164<br>(50.6)      | 3302126<br>(100)                   | 38 (0)                                         | 3228889<br>(49.4)       |
| HP18               | 3-19                     | N                         | Lysoka          | 7386100                     | 3147511<br>(42.6)      | 3134085<br>(99.6)                  | 13426 (0.4)                                    | 4238589<br>(57.4)       |
| HP19               | 20-59                    | D                         | Kumba           | 6497261                     | 312500<br>(4.8)        | 312486<br>(100)                    | 14 (0)                                         | 6184761<br>(95.2)       |
| HP20               | 20-59                    | D                         | Kumba           | 6541190                     | 1086905<br>(16.6)      | 1083357<br>(99.7)                  | 3548 (0.3)                                     | 5454285<br>(83.4)       |
| HP21               | 60+                      | D                         | Kumba           | 6226076                     | 3280492<br>(52.7)      | 3275248<br>(99.8)                  | 5244 (0.2)                                     | 2945584<br>(47.3)       |
| HP22               | 60+                      | D                         | Kumba           | 8659047                     | 2155163<br>(24.9)      | 2152470<br>(99.9)                  | 2693 (0.1)                                     | 6503884<br>(75.1)       |
| HP23               | 20-59                    | D                         | Kumba           | 7131387                     | 2297334<br>(32.2)      | 2295926<br>(99.9)                  | 1408 (0.1)                                     | 4834053<br>(67.8)       |
| HP24               | 20-59                    | D                         | Kumba           | 7798630                     | 1641048<br>(21)        | 1634668<br>(99.6)                  | 6380 (0.4)                                     | 6157582<br>(79)         |
| HP25               | 60+                      | D                         | Kumba           | 5497780                     | 2438494<br>(44.4)      | 2436703<br>(99.9)                  | 1791 (0.1)                                     | 3059286<br>(55.6)       |
| HP26               | 20-59                    | D                         | Lysoka          | 5771755                     | 972015<br>(16.8)       | 970032<br>(99.8)                   | 1983 (0.2)                                     | 4799740<br>(83.2)       |
| HP27               | 20-59                    | D                         | Lysoka          | 6102352                     | 804604<br>(13.2)       | 804336<br>(100)                    | 268 (0)                                        | 5297748<br>(86.8)       |

|      |       |   |        |          |                   |                   |                   |                    |
|------|-------|---|--------|----------|-------------------|-------------------|-------------------|--------------------|
| HP28 | 20-59 | D | Lysoka | 6157697  | 890287<br>(14.5)  | 882363<br>(99.1)  | 7924 (0.9)        | 5267410<br>(85.5)  |
| HP29 | 20-59 | D | Kumba  | 8723328  | 1443720<br>(16.6) | 1440186<br>(99.8) | 3534 (0.2)        | 7279608<br>(83.4)  |
| HP30 | 20-59 | D | Kumba  | 5120977  | 2048543<br>(40)   | 2048440<br>(100)  | 103 (0)           | 3072434<br>(60)    |
| HP31 | 20-59 | D | Kumba  | 6020103  | 1440227<br>(23.9) | 1439366<br>(99.9) | 861 (0.1)         | 4579876<br>(76.1)  |
| HP32 | 20-59 | D | Kumba  | 5596334  | 834043<br>(14.9)  | 828993<br>(99.4)  | 5050 (0.6)        | 4762291<br>(85.1)  |
| HP33 | 20-59 | D | Kumba  | 6086553  | 597899<br>(9.8)   | 597893<br>(100)   | 6 (0)             | 5488654<br>(90.2)  |
| HP34 | 20-59 | D | Kumba  | 6367060  | 3258637<br>(51.2) | 3255679<br>(99.9) | 2958 (0.1)        | 3108423<br>(48.8)  |
| HP35 | 3-19  | I | Lysoka | 11629199 | 975804<br>(8.4)   | 567450<br>(58.2)  | 408354<br>(41.8)  | 10653395<br>(91.6) |
| HP36 | 3-19  | I | Lysoka | 10877814 | 2576296<br>(23.7) | 2575283<br>(100)  | 1013 (0)          | 8301518<br>(76.3)  |
| HP37 | 3-19  | I | Lysoka | 11875672 | 2664120<br>(22.4) | 2655829<br>(99.7) | 8291 (0.3)        | 9211552<br>(77.6)  |
| HP38 | 3-19  | I | Lysoka | 10477247 | 768030<br>(7.3)   | 741315<br>(96.5)  | 26715 (3.5)       | 9709217<br>(92.7)  |
| HP39 | 3-19  | I | Lysoka | 11714844 | 2621778<br>(22.4) | 2608220<br>(99.5) | 13558 (0.5)       | 9093066<br>(77.6)  |
| HP40 | 3-19  | I | Lysoka | 9214626  | 1280734<br>(13.9) | 1279119<br>(99.9) | 1615 (0.1)        | 7933892<br>(86.1)  |
| HP41 | 3-19  | I | Lysoka | 11716365 | 452643<br>(3.9)   | 448978<br>(99.2)  | 3665 (0.8)        | 11263722<br>(96.1) |
| HP42 | 3-19  | I | Lysoka | 10665321 | 1735994<br>(16.3) | 1731616<br>(99.7) | 4378 (0.3)        | 8929327<br>(83.7)  |
| HP43 | 20-59 | I | Lysoka | 7677258  | 167297<br>(2.2)   | 165218<br>(98.8)  | 2079 (1.2)        | 7509961<br>(97.8)  |
| HP44 | 20-59 | I | Kumba  | 13149162 | 1716814<br>(13.1) | 1598456<br>(93.1) | 118358 (6.9)      | 11432348<br>(86.9) |
| HP45 | 0-2.9 | N | Kumba  | 7075115  | 5266256<br>(74.4) | 208553 (4)        | 5057703<br>(96)   | 1808859<br>(25.6)  |
| HP46 | 0-2.9 | N | Kumba  | 4898398  | 2695244<br>(55)   | 394419<br>(14.6)  | 2300825<br>(85.4) | 2203154<br>(45)    |
| HP47 | 0-2.9 | I | Kumba  | 4679565  | 782913<br>(16.7)  | 743603<br>(95)    | 39310 (5)         | 3896652<br>(83.3)  |
| HP48 | 0-2.9 | I | Lysoka | 5107629  | 2998473<br>(58.7) | 1845695<br>(61.6) | 1152778<br>(38.4) | 2109156<br>(41.3)  |
| HP49 | 0-2.9 | N | Kumba  | 4430633  | 1156664<br>(26.1) | 1119802<br>(96.8) | 36862 (3.2)       | 3273969<br>(73.9)  |
| HP50 | 0-2.9 | N | Kumba  | 4412948  | 362260<br>(8.2)   | 362218<br>(100)   | 42 (0)            | 4050688<br>(91.8)  |
| HP51 | 0-2.9 | N | Kumba  | 6614502  | 1513991<br>(22.9) | 1512785<br>(99.9) | 1206 (0.1)        | 5100511<br>(77.1)  |
| HP52 | 0-2.9 | N | Kumba  | 6108719  | 1967777<br>(32.2) | 1953321<br>(99.3) | 14456 (0.7)       | 4140942<br>(67.8)  |
| HP53 | 0-2.9 | N | Kumba  | 5739089  | 2825362<br>(49.2) | 2806707<br>(99.3) | 18655 (0.7)       | 2913727<br>(50.8)  |
| HP54 | 0-2.9 | N | Kumba  | 3175327  | 1769023<br>(55.7) | 1769023<br>(100)  | 0 (0)             | 1406304<br>(44.3)  |
| HP55 | 0-2.9 | N | Kumba  | 5624938  | 4958824<br>(88.2) | 611293<br>(12.3)  | 4347531<br>(87.7) | 666114<br>(11.8)   |
| HP56 | 0-2.9 | I | Kumba  | 3971571  | 330698<br>(8.3)   | 329998<br>(99.8)  | 700 (0.2)         | 3640873<br>(91.7)  |
| HP57 | 3-19  | N | Kumba  | 6907327  | 1487259<br>(21.5) | 1476341<br>(99.3) | 10918 (0.7)       | 5420068<br>(78.5)  |

|      |       |   |        |         |                   |                   |                  |                   |
|------|-------|---|--------|---------|-------------------|-------------------|------------------|-------------------|
| HP58 | 3-19  | N | Kumba  | 5231886 | 2930395<br>(56)   | 2922399<br>(99.7) | 7996 (0.3)       | 2301491<br>(44)   |
| HP59 | 20-59 | I | Kumba  | 5646203 | 2074259<br>(36.7) | 2067634<br>(99.7) | 6625 (0.3)       | 3571944<br>(63.3) |
| HP60 | 20-59 | N | Kumba  | 4452181 | 990540<br>(22.2)  | 986827<br>(99.6)  | 3713 (0.4)       | 3461641<br>(77.8) |
| HP61 | 20-59 | N | Kumba  | 4856427 | 1351722<br>(27.8) | 1350447<br>(99.9) | 1275 (0.1)       | 3504705<br>(72.2) |
| HP62 | 20-59 | I | Lysoka | 4744174 | 765658<br>(16.1)  | 765631<br>(100)   | 27 (0)           | 3978516<br>(83.9) |
| HP63 | 60+   | D | Kumba  | 6146243 | 860975<br>(14)    | 587449<br>(68.2)  | 273526<br>(31.8) | 5285268<br>(86)   |

\* D: direct contact with bats; I: indirect contact with bats; N: no contact with bats

# Determined using VirSorter

## Determined using DIAMOND
