# Supplementary material for: Gut Virome Analysis of Cameroonians Reveals High Diversity of Enteric Viruses, Including Potential Interspecies Transmitted Viruses
Source: PubMed Central journal article supplement (PMC6344602; doi:10.1128/msphere.00585-18), 2019-01-23
Supplement: mSphere.00585-18-st003.pdf [file mSphere.00585-18-st003.pdf]

**Supplemental Table S3A:** Accession numbers of all viruses described in the study.

| <b>Virus</b>                   | <b>Strain</b>                           | <b>Accession number</b> |
|--------------------------------|-----------------------------------------|-------------------------|
| <b>Norovirus</b>               | NV/CMRHP1/CMR/2014                      | MH608285                |
|                                | NV/CMRHP18/CMR/2014                     | MH608286                |
|                                | NV/CMRHP59/CMR/2014                     | MH608287                |
|                                | Human-AstroV CMRHP2                     | MH933752                |
| <b>Astrovirus</b>              | Human-AstroV CMRHP3                     | MH933753                |
|                                | Human-AstroV CMRHP6                     | MH933754                |
|                                | Human-AstroV CMRHP45                    | MH933755                |
|                                | Human-AstroV CMRHP46                    | MH933756                |
|                                | Human-AstroV CMRHP35D                   | MH933757                |
|                                | Human-AstroV CMRHP34                    | MH933758                |
|                                | Human-AstroV CMRHP43                    | MH933759                |
| <b>Cosavirus</b>               | HCoSV/CMRHP6A/CMR/2014                  | MH933760                |
|                                | HCoSV/CMRHP6B/CMR/2014                  | MH933761                |
|                                | HCoSV/CMRHP24/CMR/2014                  | MH933762                |
|                                | HCoSV/CMRHP44/CMR/2014                  | MH933763                |
|                                | HCoSV/CMRHP49/CMR2014                   | MH933764                |
|                                | HCoSV/CMRHP57/CMR/2014                  | MH933765                |
| <b>Hepatitis A virus</b>       | HAV/Human/CMRHP2/CMR/2014               | MH933766                |
|                                | HAV/Human/CMRHP4/CMR/2014               | MH933767                |
|                                | HAV/Human/CMRHP6/CMR/2014               | MH933768                |
| <b>Mammalian orthoreovirus</b> | T2/CMR/Human/CMR-HP55/2014_L1           | MH933769                |
|                                | T2/CMR/Human/CMR-HP55/2014_L2           | MH933770                |
|                                | T2/CMR/Human/CMR-HP55/2014_L3           | MH933771                |
|                                | T2/CMR/Human/CMR-HP55/2014_M1           | MH933772                |
|                                | T2/CMR/Human/CMR-HP55/2014_M2           | MH933773                |
|                                | T2/CMR/Human/CMR-HP55/2014_M3           | MH933774                |
|                                | T2/CMR/Human/CMR-HP55/2014_S1           | MH933775                |
|                                | T2/CMR/Human/CMR-HP55/2014_S2           | MH933776                |
|                                | T2/CMR/Human/CMR-HP55/2014_S3           | MH933777                |
|                                | T2/CMR/Human/CMR-HP55/2014_S4           | MH933778                |
| <b>Parechovirus</b>            | HPeV-16/CMRHP2/CMR/2014                 | MH933779                |
|                                | HPeV-1/CMRHP46/CMR/2014                 | MH933780                |
|                                | HPeV-1/CMRHP48/CMR/2014                 | MH933781                |
| <b>Rotavirus A</b>             | RVA/Human-wt/CMR/CMRHP55/2014/G1P8_VP1  | MH933782                |
|                                | RVA/Human-wt/CMR/CMRHP55/2014/G1P8_VP2  | MH933783                |
|                                | RVA/Human-wt/CMR/CMRHP55/2014/G1P8_VP3  | MH933784                |
|                                | RVA/Human-wt/CMR/CMRHP55/2014/G1P8_VP4  | MH933785                |
|                                | RVA/Human-wt/CMR/CMRHP55/2014/G1P8_VP6  | MH933786                |
|                                | RVA/Human-wt/CMR/CMRHP55/2014/G1P8_VP7  | MH933787                |
|                                | RVA/Human-wt/CMR/CMRHP55/2014/G1P8_NSP1 | MH933788                |
|                                | RVA/Human-wt/CMR/CMRHP55/2014/G1P8_NSP2 | MH933789                |
|                                | RVA/Human-wt/CMR/CMRHP55/2014/G1P8_NSP4 | MH933790                |
|                                | RVA/Human-wt/CMR/CMRHP55/2014/G1P8_NSP5 | MH933791                |

|                                     |                                      |          |
|-------------------------------------|--------------------------------------|----------|
| <b>Saffold virus</b>                | CardioVirusB/CMRHP35/CMR/2014        | MH933792 |
|                                     | HumanSaV/CMR/Lysoka-HP4/2014         | MH933793 |
| <b>Sapovirus</b>                    | HumanSaV/CMR/Kumba-HP22/2014         | MH933794 |
|                                     | HumanSaV/CMR/Kumba-HP15/2014         | MH933795 |
| <b>Smacovirus</b>                   | HuSCV-CMRHP10                        | MH933796 |
|                                     | HuSCV-CMRHP03                        | MH933797 |
| <b>Pecovirus</b>                    | Hu_PeCV_CMRHP60                      | MH933798 |
| <b>Sewage-associated-like virus</b> | HP38A_Sewage-associated-like virus 1 | MH933799 |
|                                     | HP38B_Sewage-associated-like virus 2 | MH933800 |
|                                     | PBV/Human/CMRHP6A//CMR/2014          | MH933801 |
|                                     | PBV/Human/CMRHP12/CMR/2014           | MH933802 |
|                                     | PBV/Human/CMRHP20A/CMR/2014          | MH933803 |
|                                     | PBV/Human/CMRHP22A//CMR/2014         | MH933804 |
|                                     | PBV/Human/CMRHP22B/CMR/2014          | MH933805 |
|                                     | PBV/Human/CMRHP25A/CMR/2014          | MH933806 |
|                                     | PBV/Human/CMRHP25B/CMR/2014          | MH933807 |
|                                     | PBV/Human/CMRHP26A/CMR/2014          | MH933808 |
|                                     | PBV/Human/CMRHP26B/CMR/2014          | MH933809 |
|                                     | PBV/Human/CMRHP26C/CMR/2014          | MH933810 |
|                                     | PBV/Human/CMRHP26D/CMR/2014          | MH933811 |
|                                     | PBV/Human/CMRHP28/CMR/2014           | MH933812 |
|                                     | PBV/Human/CMRHP32A/CMR/2014          | MH933813 |
|                                     | PBV/Human/CMRHP32B/CMR/2014          | MH933814 |
|                                     | PBV/Human/CMRHP32C/CMR/2014          | MH933815 |
|                                     | PBV/Human/CMRHP34A/CMR/2014          | MH933816 |
|                                     | PBV/Human/CMRHP34B/CMR/2014          | MH933817 |
|                                     | PBV/Human/CMRHP35/CMR/2014           | MH933818 |
| <b>Picobirnavirus</b>               | PBV/Human/CMRHP47A/CMR/2014          | MH933819 |
|                                     | PBV/Human/CMRHP47B/CMR/2014          | MH933820 |
|                                     | PBV/Human/CMRHP49A/CMR/2014          | MH933821 |
|                                     | PBV/Human/CMRHP52/CMR/2014           | MH933822 |
|                                     | PBV/Human/CMRHP63A/CMR/2014          | MH933823 |
|                                     | PBV/Human/CMRHP63B/CMR/2014          | MH933824 |
|                                     | PBV/Human/CMRHP10A/CMR/2014          | MH933825 |
|                                     | Lysoka picobirna-like virus CMRHP10B | MH933826 |
|                                     | PBV/Human/CMRHP20B/CMR/2014          | MH933827 |
|                                     | PBV/Human/CMRHP20C/CMR/2014          | MH933828 |
|                                     | Kumba picobirna-like virus CMRHP21A  | MH933829 |
|                                     | PBV/Human/CMRHP21B/CMR/2014          | MH933830 |
|                                     | PBV/Human/CMRHP21C/CMR/2014          | MH933831 |
|                                     | PBV/Human/CMRHP24/CMR/2014           | MH933832 |
|                                     | PBV/Human/CMRHP26E/CMR/2014          | MH933833 |
|                                     | PBV/Human/CMRHP32D/CMR/2014          | MH933834 |
|                                     | PBV/Human/CMRHP49B/CMR/2014          | MH933835 |
|                                     | PBV/Human/CMRHP60A/CMR/2014          | MH933836 |
|                                     | PBV/Human/CMRHP60B/CMR/2014          | MH933837 |

|                    |                                     |          |
|--------------------|-------------------------------------|----------|
|                    | PBV/Human/CMRHP60C/CMR/2014         | MH933838 |
|                    | PBV/Human/CMRHP61/CMR/2014          | MH933839 |
|                    | PBV/Human/CMRHP6B/CMR/2014          | MH933840 |
|                    | PBV/Human/CMRHP9A/CMR/2014          | MH933841 |
|                    | Lysoka picobirna-like virus CMRHP9B | MH933842 |
|                    | EV/Human/CMRHP1/CMR/2014            | MH933843 |
|                    | EV/Human/CMRHP3/CMR/2014            | MH933844 |
|                    | EV/Human/CMRHP5A/CMR/2014           | MH933845 |
|                    | EV/Human/CMRHP5B/CMR/2014           | MH933846 |
|                    | EV/Human/CMRHP8A/CMR/2014           | MH933847 |
|                    | EV/Human/CMRHP8B/CMR/2014           | MH933848 |
|                    | EV/Human/CMRHP9/CMR/2014            | MH933849 |
|                    | EV/Human/CMRHP14/CMR/2014           | MH933850 |
|                    | EV/Human/CMRHP4/CMR/2014            | MH933851 |
| <b>Enterovirus</b> | EV/Human/CMRHP18/CMR/2014           | MH933852 |
|                    | EV/Human/CMRHP35A/CMR/2014          | MH933853 |
|                    | EV/Human/CMRHP35B/CMR/2014          | MH933854 |
|                    | EV/Human/CMRHP45/CMR/2014           | MH933855 |
|                    | EV/Human/CMRHP52A/CMR/2014          | MH933856 |
|                    | EV/Human/CMRHP52B/CMR/2014          | MH933857 |
|                    | EV/Human/CMRHP55/CMR/2014           | MH933858 |
|                    | EV/Human/CMRHP58/CMR/2014           | MH933859 |
|                    | EV/Human/CMRHP39/CMR/2014           | MH933860 |

**Supplemental Table 3B:** Accession numbers of raw reads from individual pools submitted to Short Read Archive under the BioProject number PRJNA491626 and Tax ID 1861841. For ethical reasons, reads mapping to the human genome were removed.

| Sample name | Accession    | Sample name | Accession    |
|-------------|--------------|-------------|--------------|
| HP01        | SAMN10080877 | HP33        | SAMN10080909 |
| HP02        | SAMN10080878 | HP34        | SAMN10080910 |
| HP03        | SAMN10080879 | HP35        | SAMN10080911 |
| HP04        | SAMN10080880 | HP36        | SAMN10080912 |
| HP05        | SAMN10080881 | HP37        | SAMN10080913 |
| HP06        | SAMN10080882 | HP38        | SAMN10080914 |
| HP07        | SAMN10080883 | HP39        | SAMN10080915 |
| HP08        | SAMN10080884 | HP40        | SAMN10080916 |
| HP09        | SAMN10080885 | HP41        | SAMN10080917 |
| HP10        | SAMN10080886 | HP42        | SAMN10080918 |
| HP11        | SAMN10080887 | HP43        | SAMN10080919 |
| HP12        | SAMN10080888 | HP44        | SAMN10080920 |
| HP13        | SAMN10080889 | HP45        | SAMN10080921 |
| HP14        | SAMN10080890 | HP46        | SAMN10080922 |
| HP15        | SAMN10080891 | HP47        | SAMN10080923 |
| HP16        | SAMN10080892 | HP48        | SAMN10080924 |
| HP17        | SAMN10080893 | HP49        | SAMN10080925 |
| HP18        | SAMN10080894 | HP50        | SAMN10080926 |
| HP19        | SAMN10080895 | HP51        | SAMN10080927 |
| HP20        | SAMN10080896 | HP52        | SAMN10080928 |
| HP21        | SAMN10080897 | HP53        | SAMN10080929 |
| HP22        | SAMN10080898 | HP54        | SAMN10080930 |
| HP23        | SAMN10080899 | HP55        | SAMN10080931 |
| HP24        | SAMN10080900 | HP56        | SAMN10080932 |
| HP25        | SAMN10080901 | HP57        | SAMN10080933 |
| HP26        | SAMN10080902 | HP58        | SAMN10080934 |
| HP27        | SAMN10080903 | HP59        | SAMN10080935 |
| HP28        | SAMN10080904 | HP60        | SAMN10080936 |
| HP29        | SAMN10080905 | HP61        | SAMN10080937 |
| HP30        | SAMN10080906 | HP62        | SAMN10080938 |
| HP31        | SAMN10080907 | HP63        | SAMN10080939 |
| HP32        | SAMN10080908 |             |              |
